# Supplementary material for: Molecular characterization of ultrafine particles using extractive electrospray time-of-flight mass spectrometry
Source: PubMed Central journal article supplement — Environ Sci Atmos. 2021 Aug 23;1(6):434–48. doi: 10.1039/d1ea00050k (PMC8459645; doi:10.1039/d1ea00050k), 2021-08-23
Supplement: EA-001-D1EA00050K-s001.pdf [file EA-001-D1EA00050K-s001.pdf]

## Electronic Supplementary Information

### Molecular Characterization of Ultrafine Particles using Extractive Electrospray Time-of-Flight Mass Spectrometry

Mihnea Surdu<sup>1,\*</sup>, Veronika Pospisilova<sup>1,a,\*</sup>, Mao Xiao<sup>1</sup>, Mingyi Wang<sup>2</sup>, Bernhard Mentler<sup>3</sup>, Mario  
5 Simon<sup>4</sup>, Dominik Stolzenburg<sup>5</sup>, Christopher R. Hoyle<sup>1,6</sup>, David M. Bell<sup>1</sup>, Chuan Ping Lee<sup>1</sup>, Houssni  
Lamkaddam<sup>1</sup>, Felipe Lopez-Hilfiker<sup>1</sup>, Lauri R. Ahonen<sup>7</sup>, Antonio Amorim<sup>8</sup>, Andrea Baccharini<sup>1,9</sup>, Dexian  
Chen<sup>2</sup>, Lubna Dada<sup>1,7</sup>, Jonathan Duplissy<sup>7,10</sup>, Henning Finkenzeller<sup>11</sup>, Xu-Cheng He<sup>7</sup>, Victoria Hofbauer<sup>2</sup>,  
Changhyuk Kim<sup>12,13</sup>, Andreas Kürten<sup>4</sup>, Aleksandr Kvashnin<sup>15</sup>, Katrianne Lehtipalo<sup>7,16</sup>, Vladimir  
10 Makhmutov<sup>15</sup>, Ugo Molteni<sup>1,b</sup>, Wei Nie<sup>17</sup>, Antti Onnela<sup>14</sup>, Tuukka Petäjä<sup>7</sup>, Lauriane L.J. Quéléver<sup>7</sup>,  
Christian Tauber<sup>5</sup>, António Tomé<sup>18</sup>, Robert Wagner<sup>7</sup>, Chao Yan<sup>7</sup>, Andre S.H. Prevot<sup>1</sup>, Josef Dommen<sup>1</sup>,  
Neil M. Donahue<sup>2</sup>, Armin Hansel<sup>3</sup>, Joachim Curtius<sup>4</sup>, Paul M. Winkler<sup>5</sup>, Markku Kulmala<sup>7,10</sup>, Rainer  
Volkamer<sup>11</sup>, Richard C. Flagan<sup>12</sup>, Jasper Kirkby<sup>4,14</sup>, Douglas R. Worsnop<sup>7,19</sup>, Jay G. Slowik<sup>1</sup>, Dongyu S.  
Wang<sup>1</sup>, Urs Baltensperger<sup>1</sup>, Imad el Haddad<sup>1</sup>

<sup>1</sup>Laboratory of Atmospheric Chemistry, Paul Scherrer Institute, 5232 Villigen, Switzerland

15 <sup>2</sup>Center for Atmospheric Particle Studies, Carnegie Mellon University, 15213 Pittsburgh, PA, USA.

<sup>3</sup>Institute of Ion Physics and Applied Physics, University of Innsbruck, 6020 Innsbruck, Austria

<sup>4</sup>Institute for Atmospheric and Environmental Sciences, Goethe University Frankfurt, 60438 Frankfurt am Main, Germany

<sup>5</sup>Faculty of Physics, University of Vienna, 1090 Vienna, Austria

<sup>6</sup>Institute for Atmospheric and Climate Science, ETH Zurich, 8006 Zurich, Switzerland

20 <sup>7</sup>Institute for Atmospheric and Earth System Research (INAR)/Physics, Faculty of Science, University of Helsinki, 00014  
Helsinki, Finland

<sup>8</sup>CENTRA and FCUL, University of Lisbon, 1749-016 Lisbon, Portugal

<sup>9</sup>School of Architecture, Civil and Environmental Engineering, École Polytechnique Fédérale de Lausanne, 1015 Lausanne,  
Switzerland

25 <sup>10</sup>Helsinki Institute of Physics, University of Helsinki, 00014 Helsinki, Finland

<sup>11</sup>Department of Chemistry & CIRES, University of Colorado Boulder, 80309 Boulder, CO, USA

<sup>12</sup>California Institute of Technology, Division of Chemistry and Chemical Engineering 210-41, Pasadena, CA 91125, USA

<sup>13</sup>School of Civil and Environmental Engineering, Pusan National University, Busan 46241, Republic of Korea

<sup>14</sup>CERN, 1211 Geneva, Switzerland

30 <sup>15</sup>P. N. Lebedev Physical Institute of the Russian Academy of Sciences, Laboratory of Solar and Cosmic Ray Physics. 119991  
Moscow, Russia

<sup>16</sup>Finnish Meteorological Institute, 00560 Helsinki, Finland

<sup>17</sup>Joint International Research Laboratory of Atmospheric and Earth System Research, School of Atmospheric Sciences,  
Nanjing University, Nanjing, China.

35 <sup>18</sup>IDL-Universidade da Beira Interior, 6201-001 Covilhã, Portugal

<sup>19</sup>Aerodyne Research, 01821 Billerica, MA, USA

<sup>a</sup>Now at: Tofwerk AG, 3600 Thun, Switzerland

<sup>b</sup>Now at: Forest Dynamics, Swiss Federal Institute for Forest, Snow and Landscape Research WSL, 8903 Birmensdorf,  
Switzerland; Department of Chemistry, University of California, 92697 Irvine, CA, USA

40 Correspondence to: Imad el Haddad (imad.el-haddad@psi.ch), Dongyu Wang (dongyu.wang@psi.ch), Jay G. Slowik  
(jay.slowik@psi.ch)

\* These authors contributed equally to this work

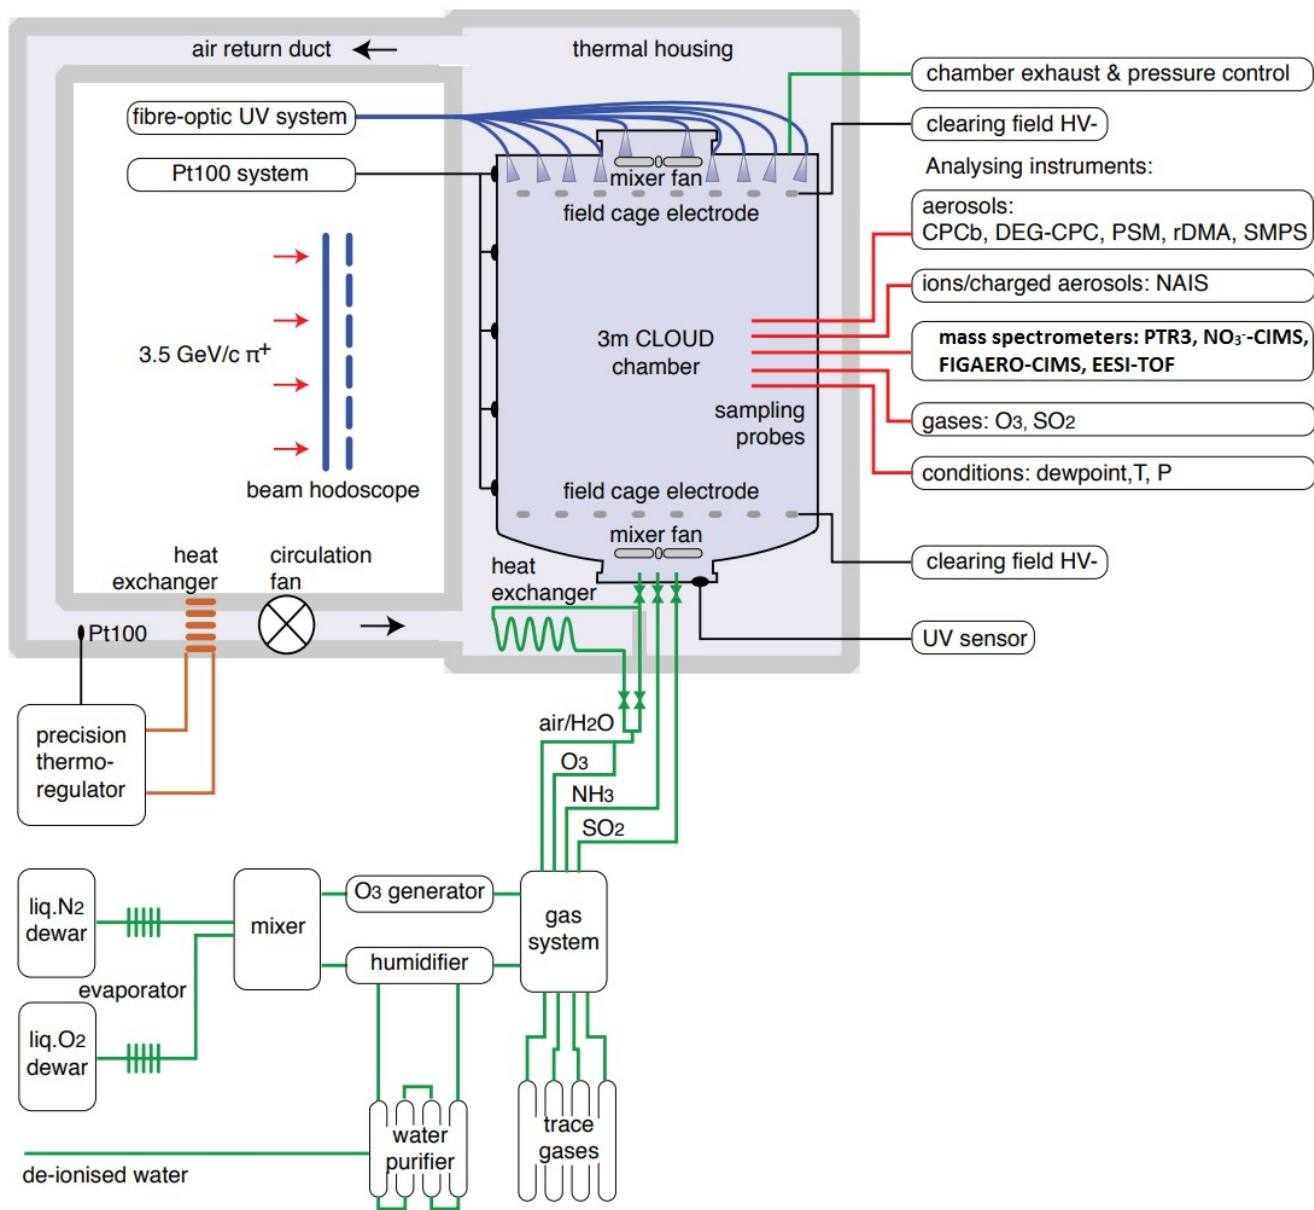

45 **Figure S1:** Schematic of the CLOUD chamber at CERN. Adapted from Kirkby et al. (2011).

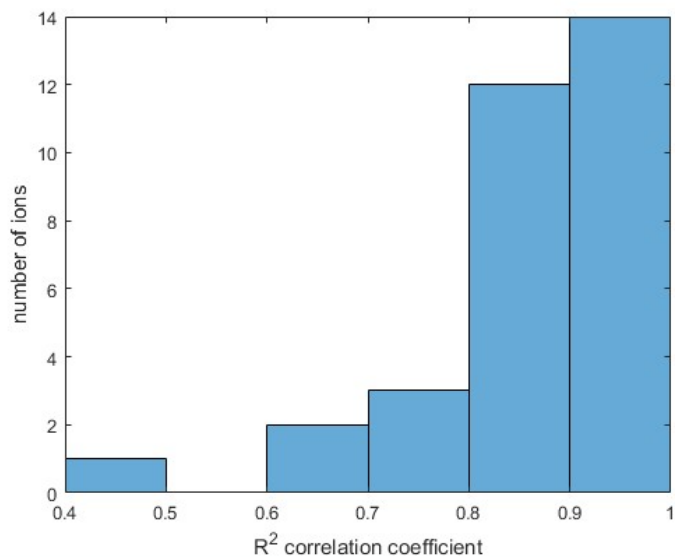

**Figure S2.** Correlation of the time series of ions identified by both the EESI-TOF and FIGAERO-CIMS for Experiment 1.

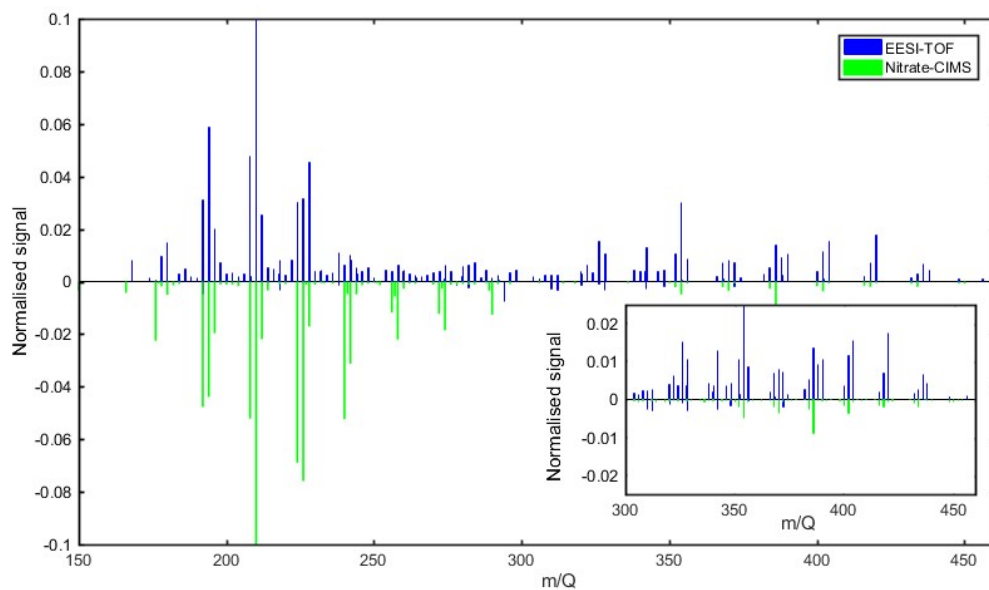

50 **Figure S3:** Mass spectra of EESI-TOF (blue) and Nitrate-CIMS (green) naphthalene oxidation products. The spectra are normalized so that the sum of all peaks is equal to one. Dimer region expanded in inset.

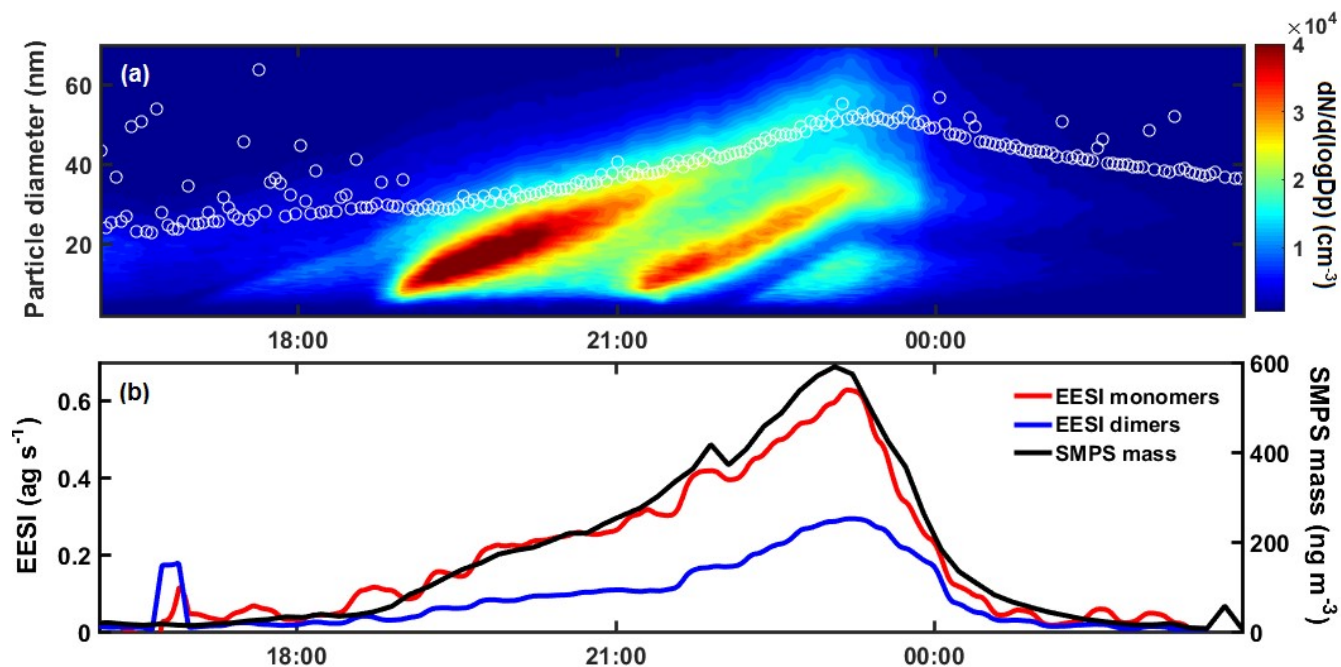

55 **Figure S4.** (a) Particle size distribution for a naphthalene experiment without  $\text{NO}_x$  (Experiment 2) (b) Time evolution of the sums of the monomer (sum of C8, C9 and C10 compounds) and dimer (C20) oxidation products from naphthalene measured by the EESI-TOF together with the total mass measured by the SMPS.

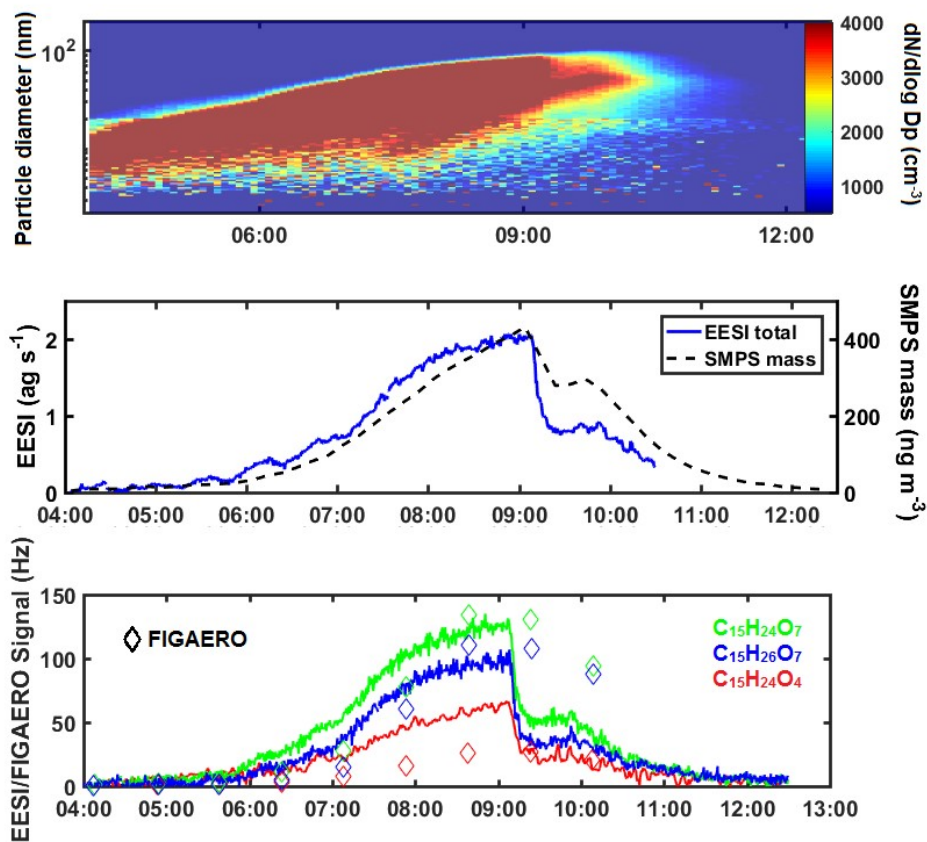

60 **Figure S5.** (a) Particle size distribution for a beta-caryophyllene experiment (Experiment 3) (b) Total EESI mass and total SMPS mass (c): Time series of selected beta-caryophyllene oxidation products as measured by the EESI-TOF (solid lines) and FIGAERO-CIMS (diamonds).

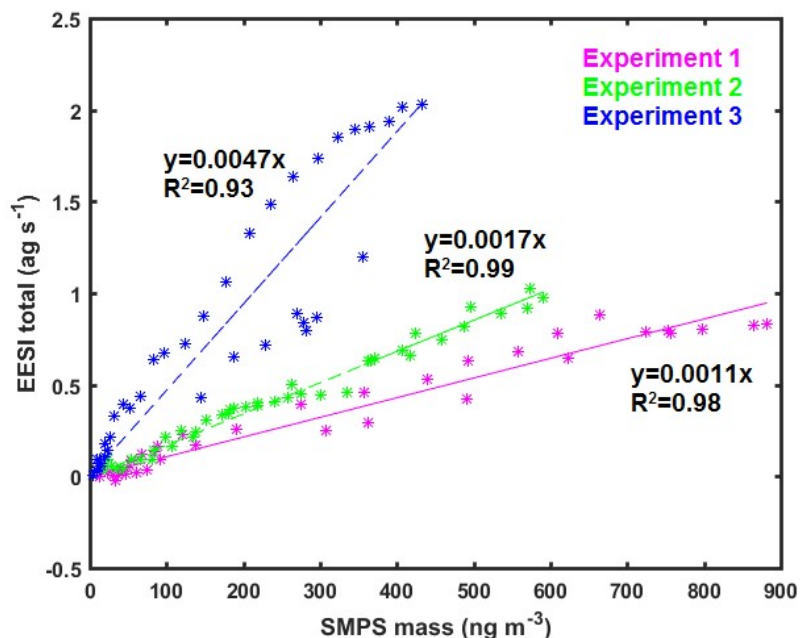

65 **Figure S6:** Correlation plot of total EESI mass flux reaching the detector and mass from the SMPS for all the experiments analyzed in this work. The y-intercept of the linear fit is forced to pass through the origin.

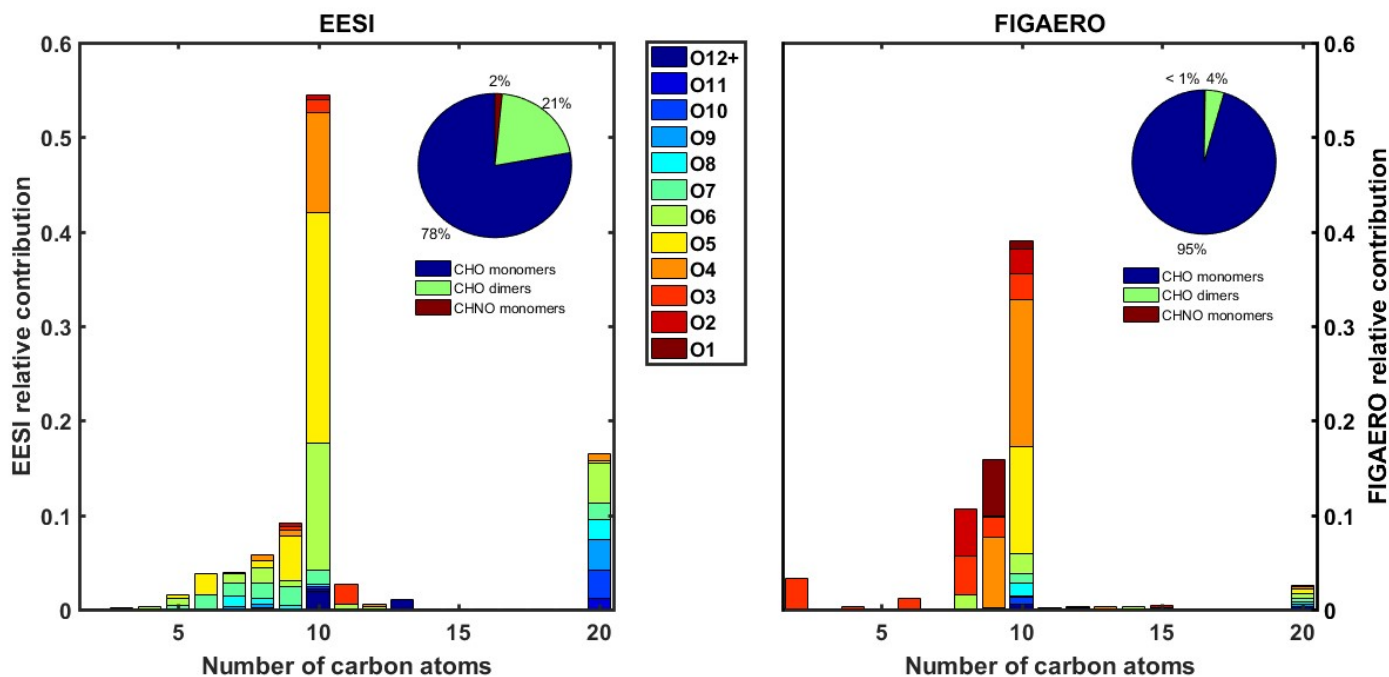

70 **Figure S7.** Carbon number distribution for naphthalene SOA in the absence of  $\text{NO}_x$  (Experiment 2) as detected by the EESI-TOF (left) and FIGAERO-CIMS (right), coloured by number of oxygen. The fractional contributions to the total aerosol signal of nitrogenated and non-nitrogenated monomers and dimers in the FIGAERO-CIMS and EESI-TOF are shown in

insets.

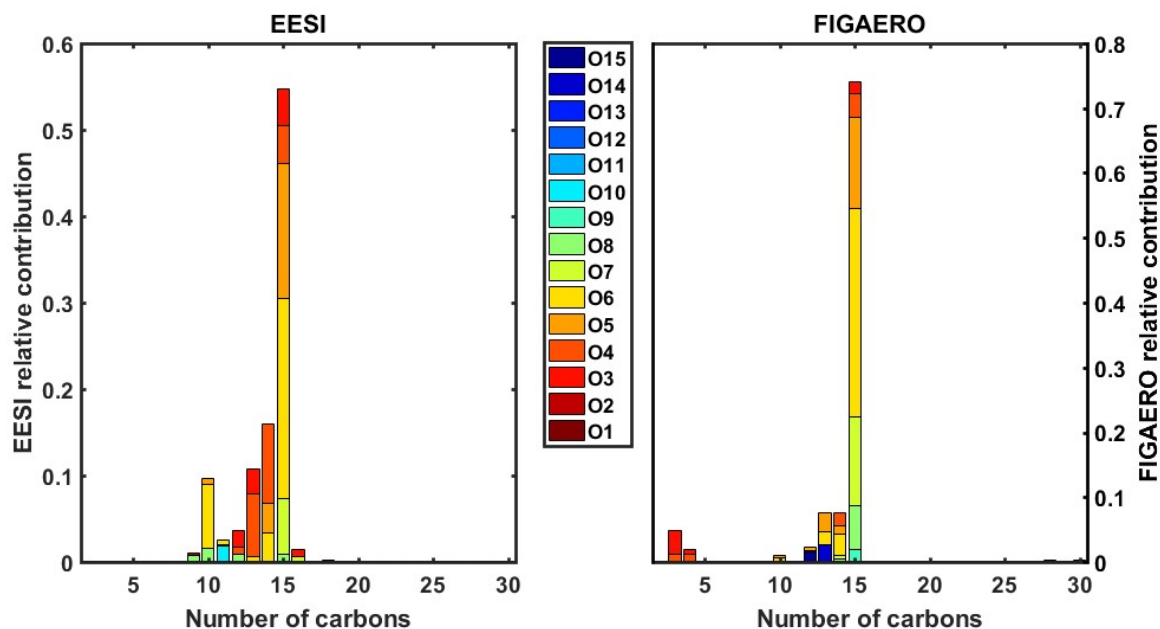

75 **Figure S8.** Carbon number distribution for beta-caryophyllene SOA (Experiment 3) as detected by the EESI-TOF (left) and FIGAERO-CIMS (right), coloured by number of oxygen.

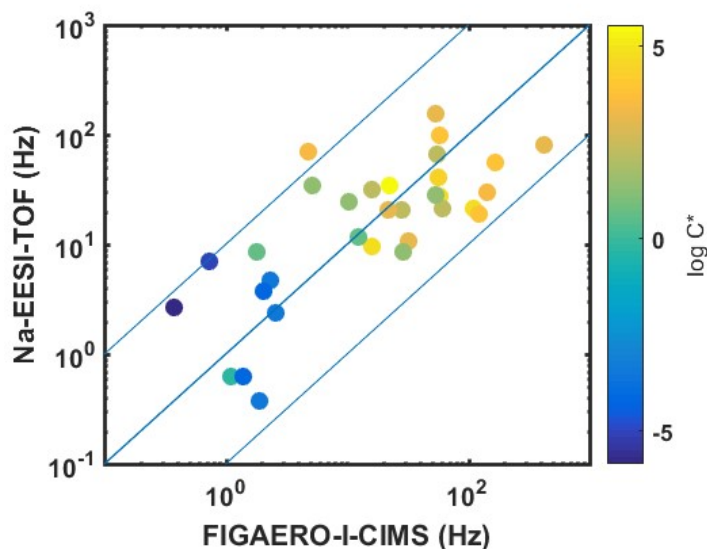

**Figure S9:** Scatter-plot of signal intensities of naphthalene oxidation products identified by both EESI-TOF and FIGAERO-CIMS for Experiment 1, coloured by volatility. The solid blue lines represent the 10:1, 1:1 and 1:10 ratios.

80

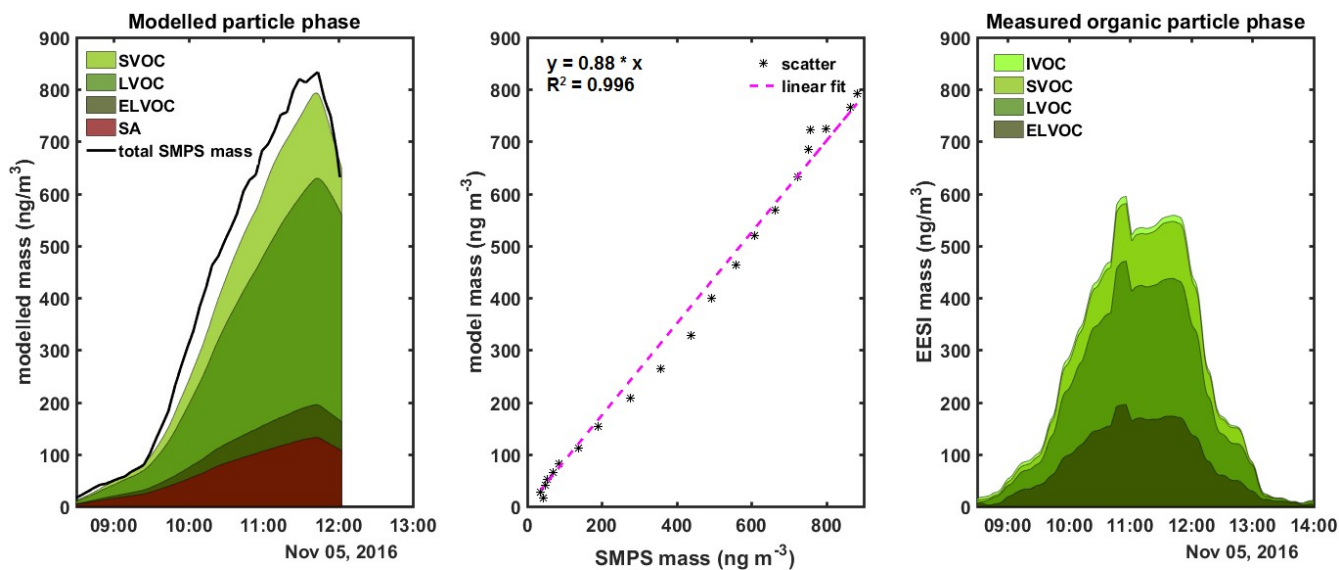

85 **Figure S10. (left)** Stacked modelled particle mass (above 6 nm) of total, ELVOC, LVOC, SVOC and sulfate (SA) particle-phase naphthalene oxidation products. The ELVOC bin is an overflow bin and thus contains all compounds with  $\log C^* < -4.5$ . Total SMPS mass overlaid as solid black line. **(middle)** Correlation plot of total mass from the aerosol growth model and the SMPS. Linear fit line is forced through the origin **(right)** Stacked measured concentrations of total, ELVOC, LVOC, SVOC, IVOC particle-phase naphthalene oxidation products from the EESI- TOF, assuming a uniform response factor, for the entire duration of Experiment 2.



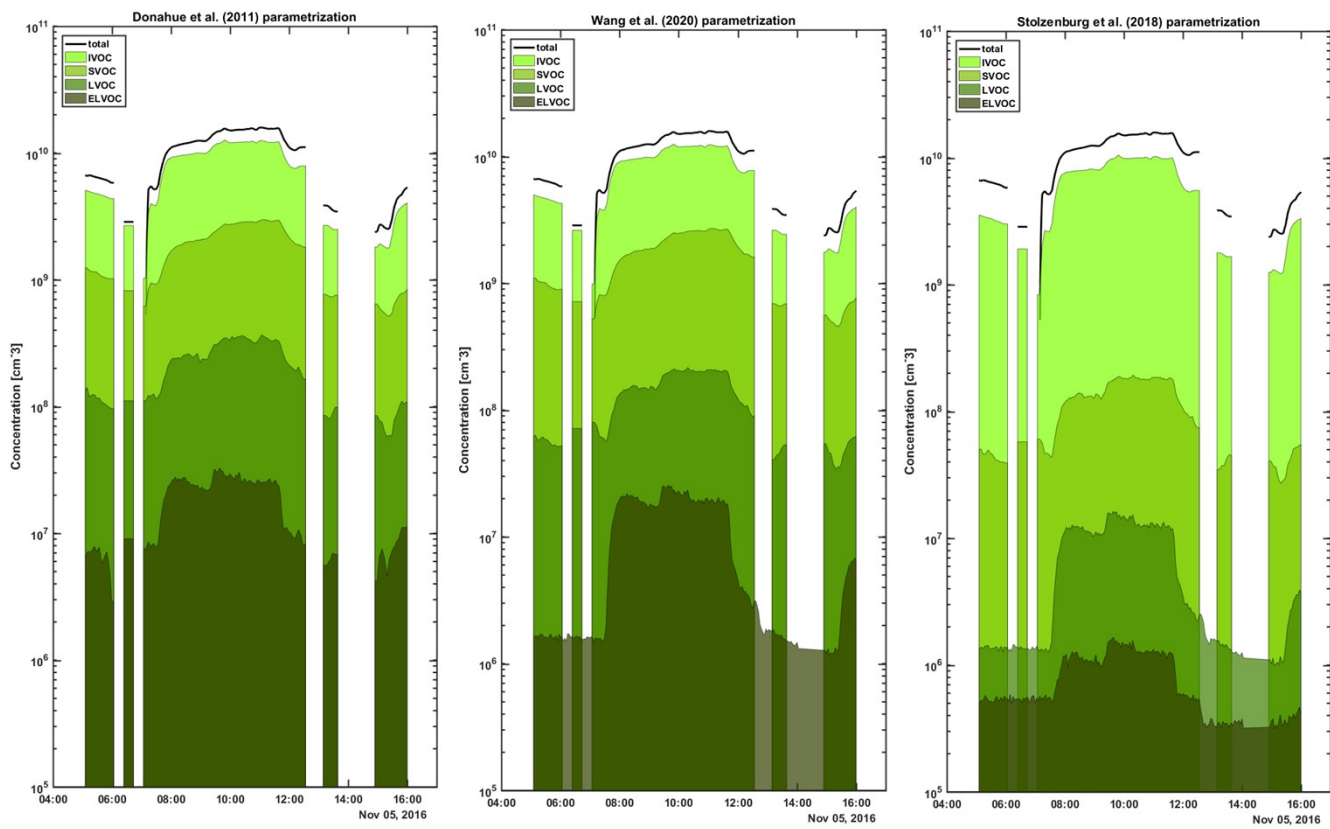

90

**Figure S11.** Combined gas phase concentrations measured by the PTR3 and the Nitrate-CIMS, binned according to their estimated volatility provided by different parametrizations: **(left)** Donahue et al., 2011 **(middle)** Wang et al., 2020 **(right)** Stolzenburg et al., 2018.

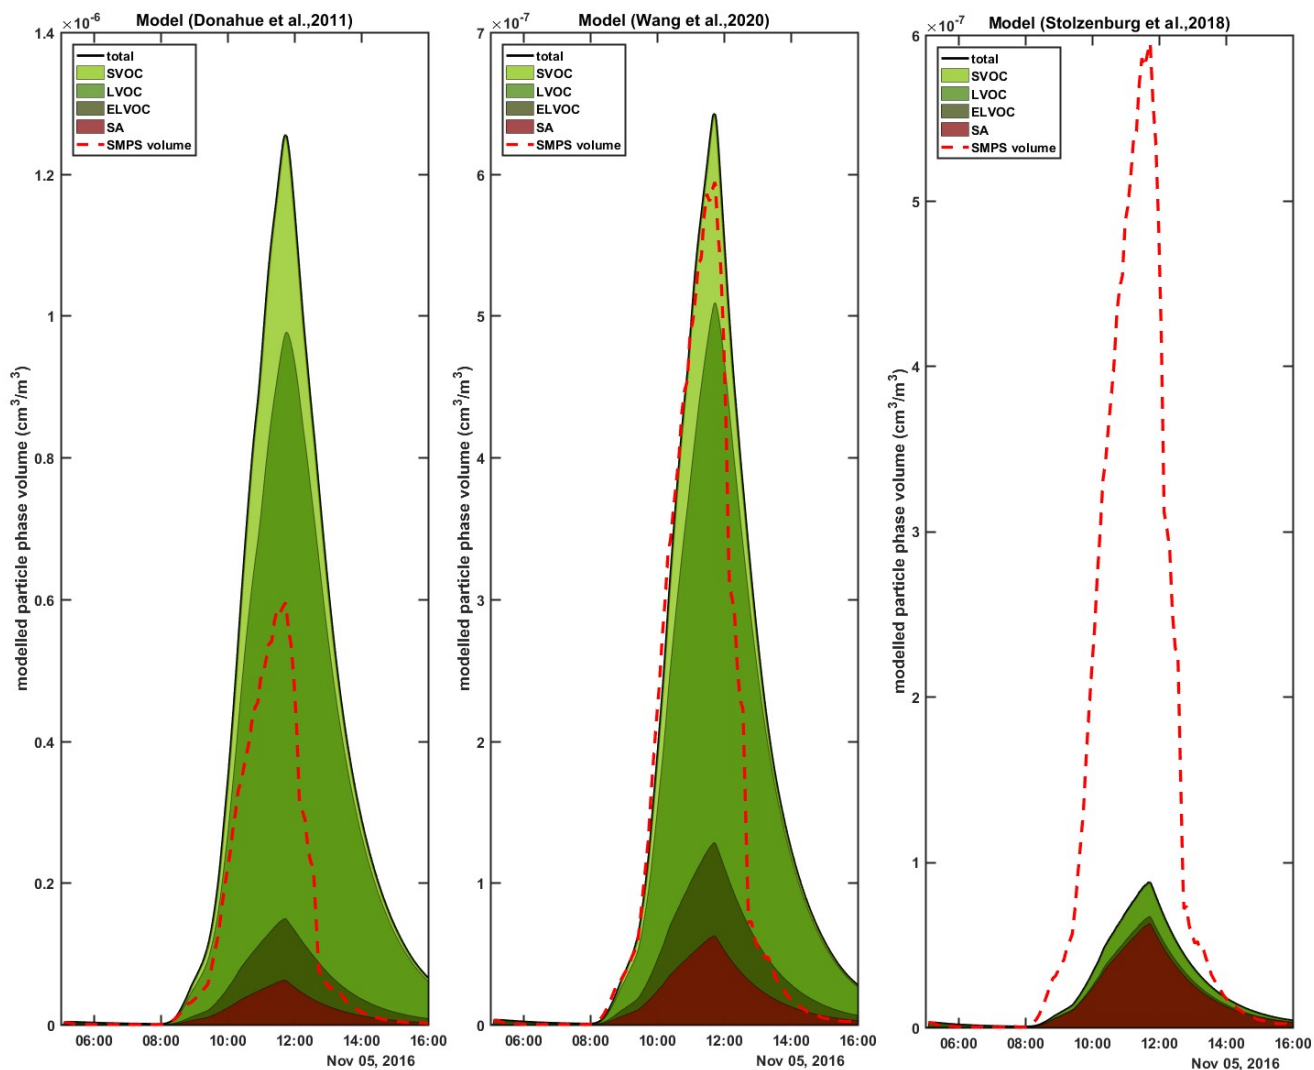

95 **Figure S12.** Modelled particle phase according to different parametrizations **(left)** Donahue et al., 2011 **(middle)** Wang et al., 2020 **(right)** Stolzenburg et al., 2018. Active (HV field + fans) cleaning starting at 12:03 is not considered in the model. Note that the y-axis scale is different between panels a, b and c.

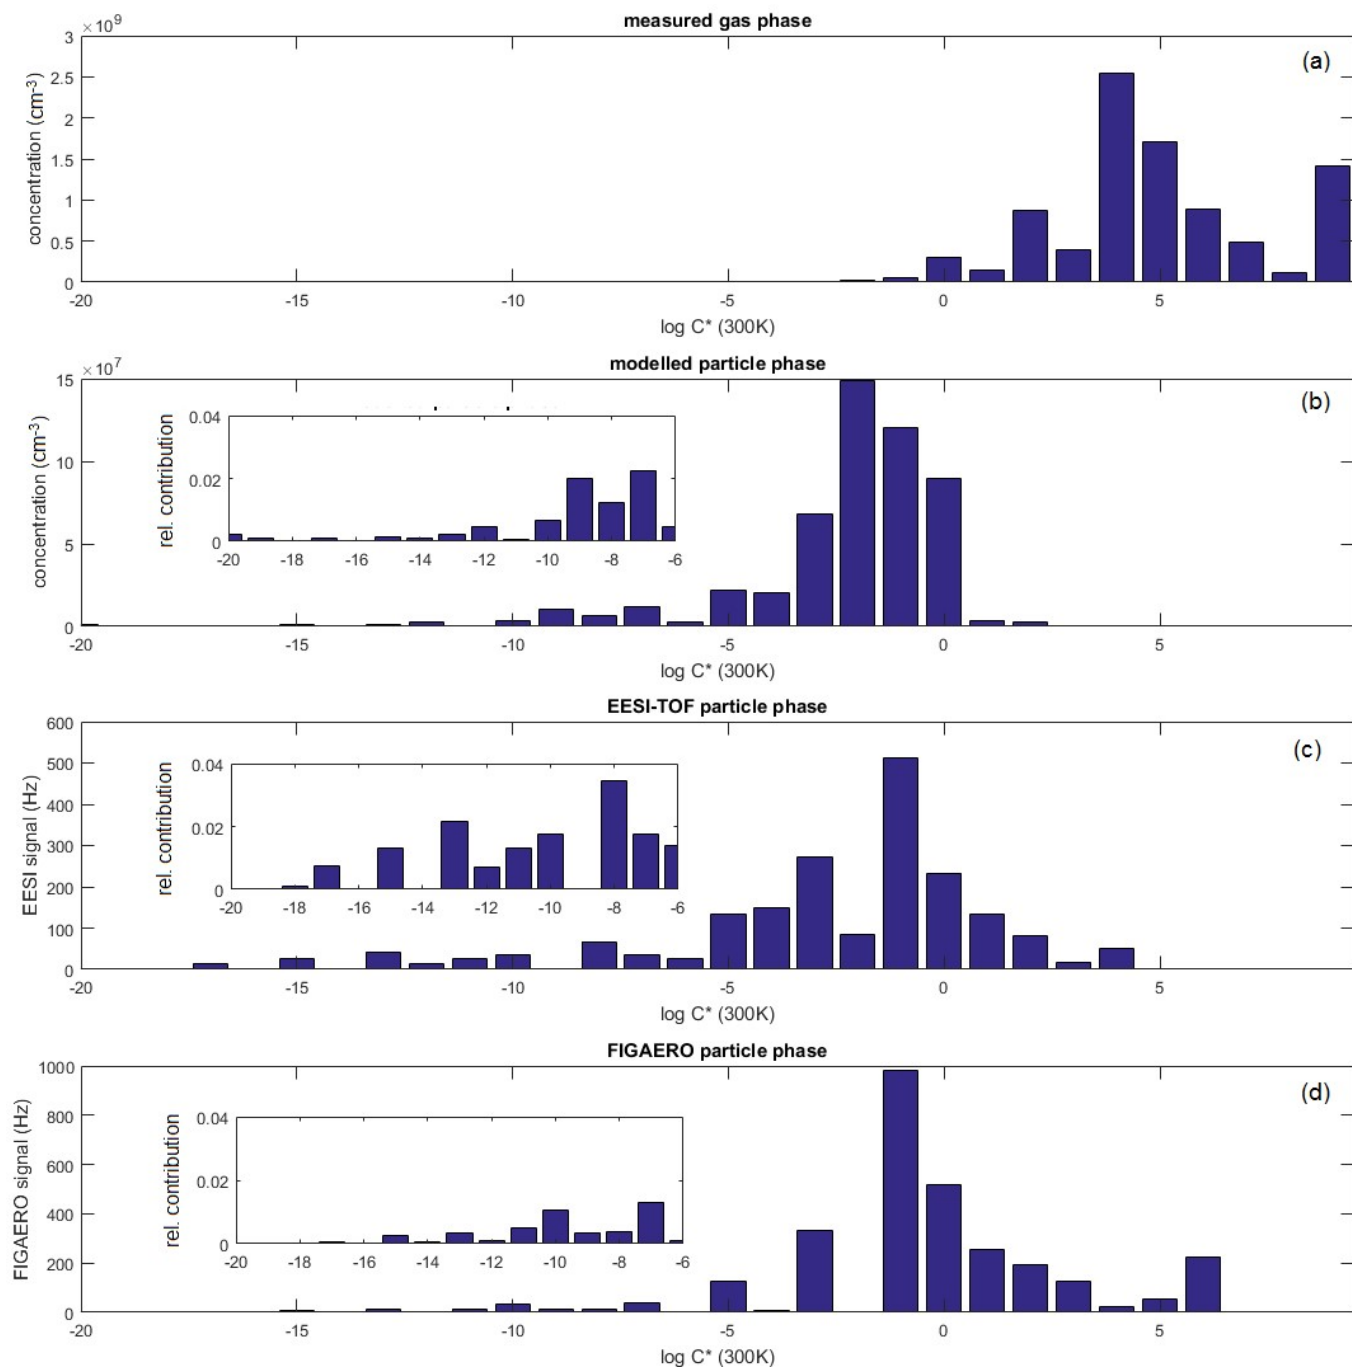

**Figure S13.** Estimated volatility distributions of naphthalene oxidation products: **(a)** measured gas phase **(b)** modelled particle phase, and **(c)** particle phase measured by the EESI-TOF and **(d)** FIGAERO-CIMS. Relative contributions at maximum mass concentration of bins with  $\log C^* < -6$  expanded in inset.

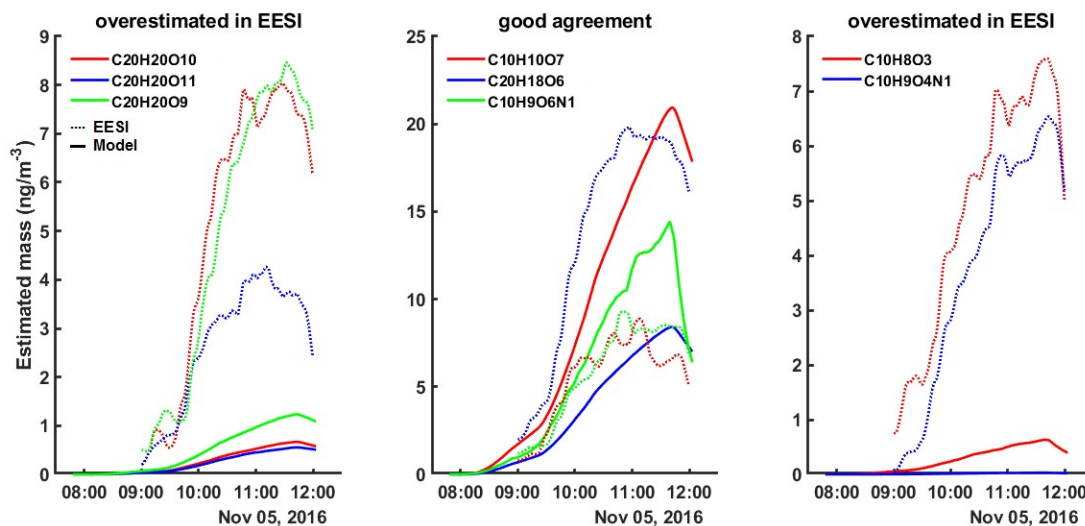

105 **Figure S14.** Example time series of ions overestimated and in good agreement in the EESI-TOF particle-phase data compared to the aerosol growth model results. Dotted lines correspond to measured EESI-TOF data while solid lines are modelled concentrations.

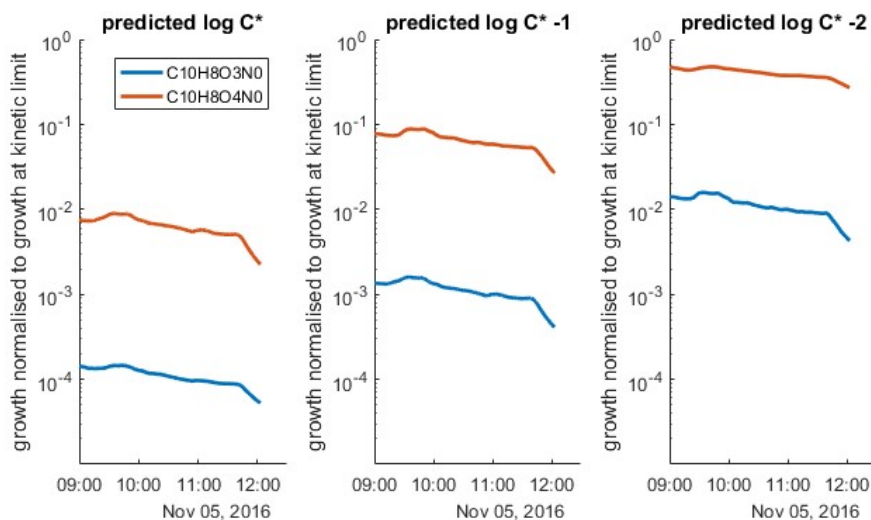

110 **Figure S15.** Example effect of changing the estimated volatility by 1 (middle) and 2 orders of magnitude (right) compared to the predicted one (left) for selected ions that appear more abundant in the EESI-TOF data compared to the aerosol growth model results.

115
